# Supplementary material for: Sorption of arsenate onto magnetic iron–manganese (Fe–Mn) biochar composites
Source: Royal Society of Chemistry journal article supplement (doi:10.1039/c5ra12137j), 2015-01-01

## Supporting Information

### Sorption of arsenate onto magnetic iron-manganese (Fe-Mn) biochar composites

Shengsen Wang<sup>1</sup>, Bin Gao<sup>1\*</sup>, Yuncong Li<sup>2</sup>, Yongshan Wan<sup>2</sup>, Anne Elise Creamer<sup>1</sup>

1. *Department of Agricultural and Biological Engineering, University of Florida, Gainesville, FL 32611*
2. *Tropical Research and Education Center, Soil and Water Science Department, University of Florida, Homestead, FL 33031*

---

\* Corresponding author: phone: (1) 352-392-1864 ext. 285, email: [bg55@ufl.edu](mailto:bg55@ufl.edu)

**Figure S1.** Magnetic properties of FMM and FMB

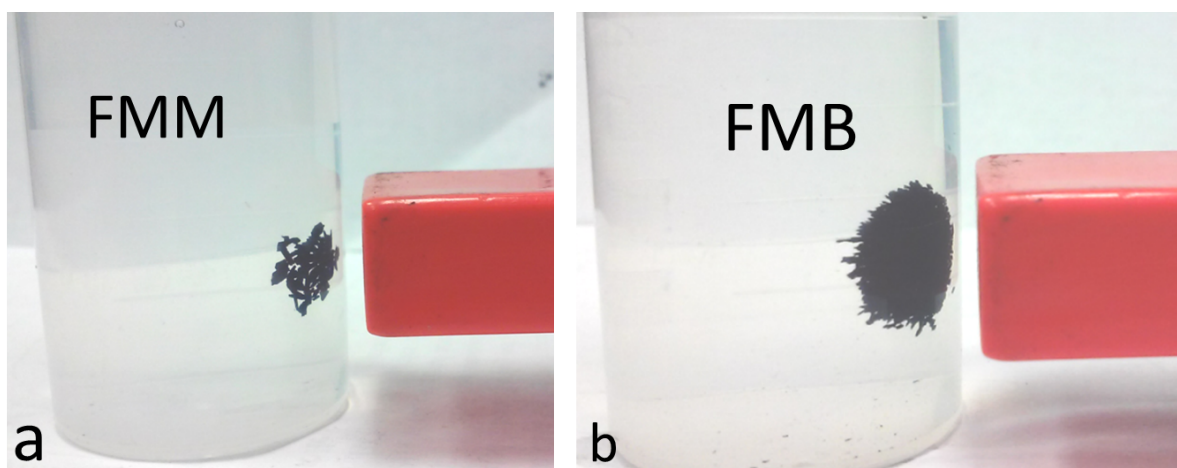

**Figure S2.** SEM images of biochars: PB (a, d), FMM (b, e), and FMB (c, f) at x1000 (a, b, c) and x10,000 (d, e, f).

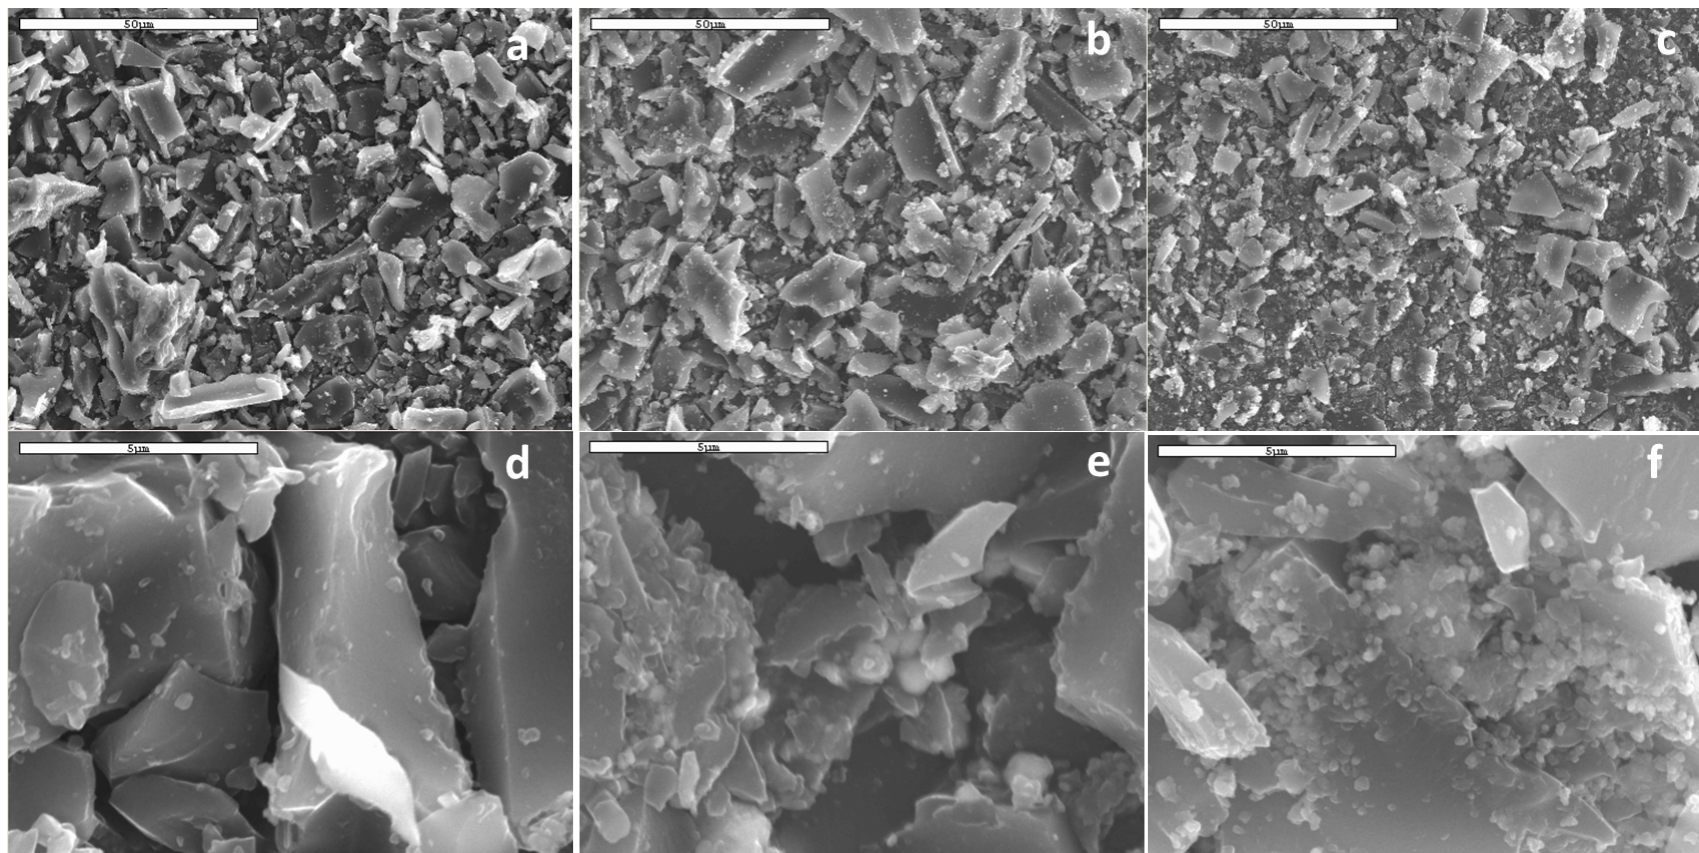

**Figure S3.** EDS spectra of biochars: PB (a), FMM (b), and FMB (c) (1000X)

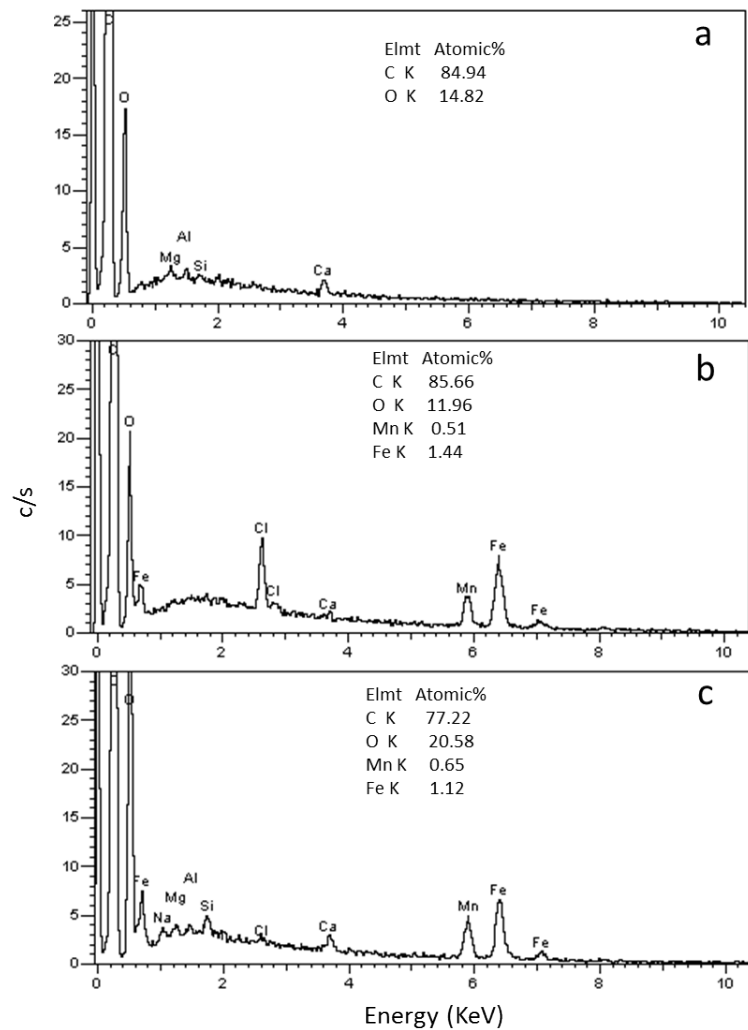

**Figure S4.** XPS diffraction patterns of Fe2p<sub>1/2</sub> and Fe2p<sub>3/2</sub> spectra of FMM (a) and FMB (b)

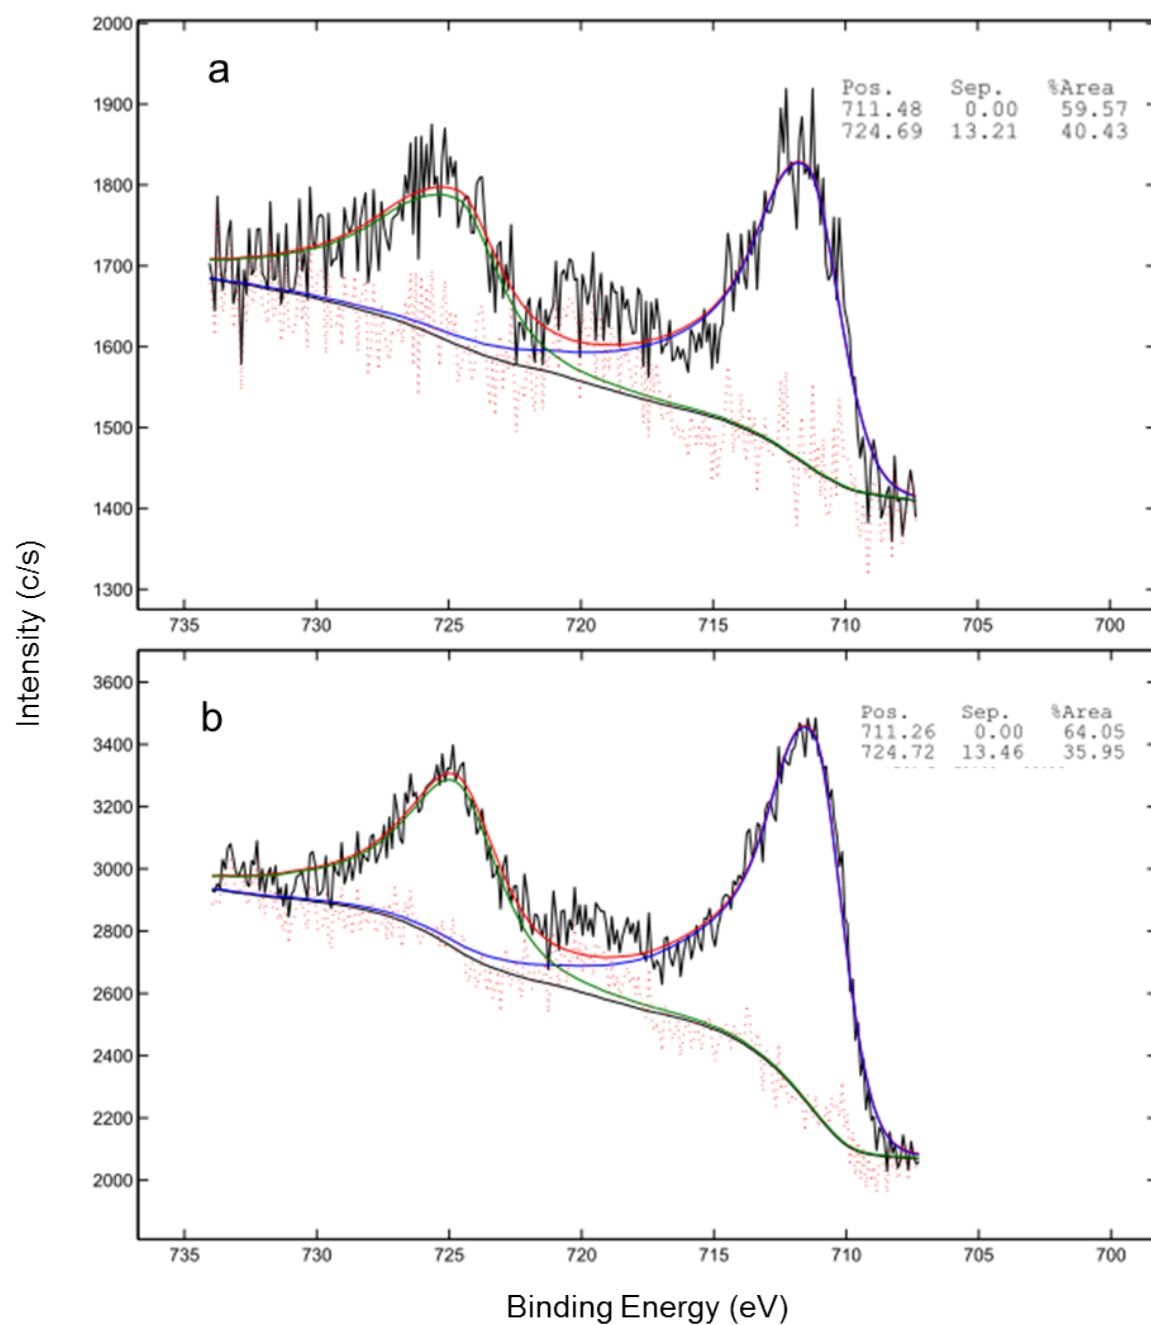

Supplement: c5ra12137j1.pdf [file c5ra12137j1.pdf]
